## Low-Intensity Exercise Improves Aerobic Exercise Capacity in Rats After Myocardial Infarction and the Possible Role of Skeletal Muscle Autophagy

Li-mei Chen,<sup>1</sup> Wen-wen Peng,<sup>2</sup> Gui-qing Xu,<sup>3</sup> Yue Guo,<sup>3</sup> Ling-jie Wei,<sup>3</sup> Cheng Lin,<sup>3</sup> Yan-xia Pan, and Shi-zhong Wang<sup>4</sup>

<sup>1</sup>Department of Physical Education and Research, Fujian Medical University, Fuzhou, Fujian, China; <sup>2</sup>Department of Clinical Medicine of Xiamen Medical College, Xiamen, Fujian, China; <sup>3</sup>Department of Rehabilitation Therapy, School of Medical Technology and Engineering, Fujian Medical University, Fuzhou, Fujian, China; <sup>4</sup>Fujian Medical University, Fuzhou, Fujian, China.

Correspondence: Yan-xia Pan ([ypan266@sina.com](mailto:ypan266@sina.com)).

**Background:** To investigate the effects of low-intensity exercise on aerobic exercise capacity and autophagy of skeletal muscle in rats after myocardial infarction (MI) and its possible mechanisms.

**Methods:** Thirty male Sprague Dawley rats, weighing 180–200 g, were randomly divided into sham, MI, and MI with exercise training (MI + Ex) groups. MI was induced by ligation of the left anterior descending artery. One week after surgery, low-intensity exercise training was carried out on a treadmill 5 days per week for 4 weeks.

**Results:** Infarct size of MI and MI + Ex groups was  $30.8 \pm 5.5\%$  and  $27.6 \pm 5.0\%$  of left ventricle, respectively ( $P > 0.05$ ). Heart weight and heart to body weight ratio in the MI group were significantly higher than those in the sham group ( $P < 0.01$ ), and were lowered by exercise training ( $P < 0.01$ ). The maximal exercise distance and duration in the MI group were lower than those in the sham group ( $P < 0.01$ ), but were significantly increased by exercise training ( $P < 0.05$ ). Autophagosome of the gastrocnemius was not detectable in the sham group, scattered in the MI group but clustered in the MI + Ex group. Microtubule-associated protein light chain 3 (LC3-I/II) and Beclin-1 protein levels in the gastrocnemius were similar between MI and sham groups, but were significantly higher in the MI + Ex group ( $P < 0.05$ ).

**Conclusions:** Low-intensity exercise improves exercise capacity in rats after MI. The effect is associated with enhanced autophagy of the skeletal muscle.

## Relationship Between Arterial Stiffness and Cardiovascular Risk Scores Predicted by 2 Different Models

Ting-jun Wang,<sup>1,2,3</sup> Xiao-qi Cai,<sup>1</sup> Ling-yu Zhang,<sup>1</sup> Yi-hua Shen,<sup>1</sup> Qun-fang Xie,<sup>3</sup> Guo-yan Xu,<sup>1</sup> and Liang-di Xie<sup>1,2,3</sup>

<sup>1</sup>Department of Geriatrics, The First Affiliated Hospital of Fujian Medical University, Fuzhou, Fujian, China; <sup>2</sup>Department of General Medicine, The First Affiliated Hospital of Fujian Medical University, Fuzhou, Fujian, China; <sup>3</sup>Fujian Hypertension Research Institute, The First Affiliated Hospital of Fujian Medical University, Fuzhou, Fujian, China. Correspondence: Guo-yan Xu ([gypson10@hotmail.com](mailto:gypson10@hotmail.com)).

**Background:** To investigate the relationship between arterial stiffness and 10-year atherosclerotic cardiovascular disease (ASCVD) risk predicted by models of pooled cohort equations (PCEs) or ASCVD risk in China (China-PAR).

**Methods:** A cross-sectional clinical study was carried out, in which clinical data were collected from 1,090 subjects aged 30–75 years who were admitted to a university affiliated hospital from 2016 to 2018. Arterial stiffness was examined by carotid–femoral pulse wave velocity (cfPWV). All subjects were divided into 2 groups: normal arterial stiffness (cfPWV  $< 10$  m/second) and elevated arterial stiffness (cfPWV  $\geq 10$  m/second). Ten-year ASCVD risk was predicted by either PCE or China-PAR.

**Results:** ASCVD risks predicted by 2 models in the elevated arterial stiffness group were higher than those in the normal arterial stiffness group [PCE: 16.5% (8.6%–28.3%) vs. 6.3% (2.7%–12.3%); China-PAR: 8.8% (6.1%–12.4%) vs. 3.9% (2.1%–6.6%), both  $P < 0.001$ ]. The correlation coefficient between cfPWV and ASCVD risk predicted by China-PAR was greater than that by PCE (0.573 vs. 0.503,  $z = 5.272$ ,  $P < 0.001$ ). Multivariate linear regression analysis showed that 10-year ASCVD risk predicted by PCE model ( $\beta = 0.475$ ,  $P < 0.001$ ) and waist circumference ( $\beta = 0.092$ ,  $P = 0.001$ ) correlated with cfPWV. However, when PCE was replaced by China-PAR, only ASCVD risk ( $\beta = 0.573$ ,  $P < 0.001$ ), not waist circumference, was associated with arterial stiffness. Receiver operation characteristic curve showed that the discrimination of 10-year ASCVD risk predicted by China-PAR for arterial stiffness was better than PCE (area under curve 0.814 vs. 0.767,  $z = 4.992$ ,  $P < 0.001$ ). A stratification analysis revealed that the better discrimination by China-PAR mainly came from males.

**Conclusions:** Ten-year ASCVD risks predicted by either China-PAR or PCE are associated with arterial stiffness. The association is stronger when the risk is predicted by China-PAR, especially in males.
